# Supplementary material
Source: PubMed Central journal article supplement (PMC3488132)
Supplement: NIHMS395526-supplement-01.pdf [file NIHMS395526-supplement-01.pdf]

## Alzheimer Risk Variant *CLU* and Brain Function during Aging

### *Supplemental Information*

**Table S1. Annual rates of change in performance on cognitive tests among participants in the <sup>15</sup>O-water PET studies.** For each task or cognitive domain, a linear mixed-effect model, adjusting for sex, baseline age, APOE ε4 status and race, was used to compare changes from the baseline to the last follow-up time points among the TT, CT and CC groups of the rs11136000 *CLU* SNP. For all tasks except BVRT and Trails A and B, positive slopes indicate improved performance and negative slopes indicate decreased performance over time. The numbers in each column represent the estimated annual rates of change in performance scores (standard error) for the cognitive tests.

|        | Group (number of C-alleles in the <i>CLU</i> rs11136000 SNP) |                |                 | Group<br>Difference ( <i>p</i> ) |
|--------|--------------------------------------------------------------|----------------|-----------------|----------------------------------|
|        | 0                                                            | 1              | 2               |                                  |
| CVLT   | 0.60 (0.31)                                                  | 0.20 (0.18)    | 0.087 (0.21)    | 0.16                             |
| BVRT   | 0.20 (0.076)                                                 | 0.16 (0.04)    | 0.086 (0.049)   | 0.35                             |
| FLULET | 0.060 (0.078)                                                | 0.068 (0.043)  | -0.014 (0.051)  | 0.45                             |
| FLUCAT | -0.11 (0.066)                                                | -0.13 (0.037)  | -0.049 (0.044)  | 0.39                             |
| TRATS  | 0.013 (0.25)                                                 | -0.22 (0.14)   | -0.15 (0.17)    | 0.89                             |
| TRBTS  | 0.36 (0.74)                                                  | -0.034 (0.42)  | 0.30 (0.49)     | 0.87                             |
| CRDROT | 1.17 (0.65)                                                  | 0.27 (0.36)    | 0.77 (0.43)     | 0.56                             |
| DIGBAC | -0.030 (0.051)                                               | -0.018 (0.028) | -0.020 (0.033)  | 0.99                             |
| DIGFOR | 0.076 (0.053)                                                | -0.012 (0.030) | -0.0041 (0.035) | 0.26                             |

CVLT, California Verbal Learning Test; BVRT, Benton Visual Retention Test; FLULET, letter fluency; FLUCAT, category fluency; TRATS: Trails-A test; TRBTS, Trails-B test; CRDROT, card rotations; DIGBAC, digits backward; DIGFOR, digits forward.
